# Supplementary material
Source: HighWire-hosted journal article supplement (https://rmdopen.bmj.com/content/2/2/e000313)
Supplement: inline-supplementary-material-2 [file inline-supplementary-material-2.xlsx]

## Sheet: Quality assessment table
+: yes –: no x: na	setting			Patients			GC prior to study					demographics				Number of patients		GC during study			BMD			Tx study	% Yes*
	Location	Period inclusion	Length FU	Inclusion criteria	Exclusion criteria	Method selection	Length	Mean dose	Cum. Dose	Missing data	Loss to FU	Menopausal status	Age	Disease duration	Gender	Per diagnosis	Per FU moment	Mean dose	Cum. dose	Max. dose	Mean: start, end, change	SD or SEM	Results per diagnosis	Rejections reported
chronic disease
Buckley	+	+	+	+	+	+	+	+	+	+	+	+	+	+	+	+	+	+	+	+	+	+	–	x	95.6522
Geusens	+	+	+	+	+	+	+	+	+	+	+	+	+	–	+	–	+	+	+	+	+	+	–	x	86.9565
Hansen 98	+	+	+	+	+	+	+	+	+	+	+	+	+	+	+	+	+	+	+	+	+	+	+	x	86.9565
Westby	+	+	+	+	+	+	+	+	–	+	+	–	+	+	+	+	+	+	–	+	+	+	+	x	86.9565
Reid	–	+	+	+	+	+	+	+	+	+	+	+	+	–	+	+	+	+	–	+	+	+	–	x	82.6087
Abitol	+	+	+	+	+	–	–	–	–	+	+	+	+	+	+	+	+	+	+	+	+	+	+	x	82.6087
Roux	+	+	+	+	+	+	+	–	–	+	+	+	+	–	+	+	+	+	+	+	+	+	–	x	82.6087
Hakala	+	–	+	+	+	+	+	–	–	+	+	+	+	–	+	+	+	+	+	+	+	+	–	x	78.2609
Pearce	+	+	+	+	+	+	+	+	+	–	–	+	+	–	–	+	+	+	+	+	+	–	+	x	78.2609
Jardinet	–	–	+	+	+	–	–	–	+	+	+	+	+	+	+	+	+	+	–	+	+	+	+	x	73.913
Pons	–	–	+	+	+	+	+	+	+	–	–	+	+	+	+	+	+	+	–	+	+	–	+	x	73.913
Pitt	–	+	+	+	+	+	+	+	+	–	–	+	+	+	+	–	–	+	+	+	+	+	–	x	73.913
Saag	–	+	+	+	+	+	+	+	–	–	–	+	+	–	+	+	+	+	+	+	+	+	–	x	73.913
Sebaldt	+	+	+	+	+	+	+	+	–	–	–	–	+	+	+	–	+	+	+	+	+	+	–	x	73.913
Stoch	+	+	+	+	+	+	+	+	–	+	+	+	+	–	+	+	–	+	–	–	+	+	–	x	73.913
Van Everdingen	+	+	+	+	+	+	–	–	–	+	+	+	+	–	+	+	+	+	+	+	+	–	–	x	73.913
Hansen 99	–	–	+	–	–	–	–	+	+	+	+	+	+	+	+	+	+	+	+	+	+	+	–	x	69.5652
Benucci	+	–	+	+	+	–	+	+	+	–	–	–	+	+	+	+	+	+	+	–	+	+	–	x	69.5652
Lems	–	+	+	+	+	+	–	+	–	–	+	+	+	–	+	+	+	+	–	+	+	–	+	x	69.5652
Cino	+	+	+	+	+	+	+	–	–	+	+	–	+	+	+	+	+	–	–	–	+	+	–	x	69.5652
Van Schaardenburg	+	+	+	+	+	–	x	x	x	+	+	+	+	+	+	+	+	+	–	+	+	+	+	x	65.2174
Adachi 96	+	+	+	+	+	+	x	x		+	+	–	+	–	+	+	+	+	+	+	+	+	–	x	65.2174
Kotaniemi	–	–	+	+	+	–	+	+	+	–	–	+	+	–	+	+	+	+	–	+	+	–	+	x	65.2174
Kipen	–	+	+	+	+	+	x	x	x	–	–	+	+	+	+	+	+	+	+	+	+	+	+	x	60.8696
Cohen	+	+	+	+	+	+	x	x	x	+	+	+	+	–	+	–	+	+	+	+	+	+	–	x	60.8696
Ferraccioli	+	+	+	+	+	+	x	x	x	+	+	–	+	+	+	–	+	+	+	+	+	+	–	x	60.8696
Uaratanawong	+	–	+	+	+	–	+	+	+	–	–	+	+	+	+	+	x	+	+	–	+	+	x	x	60.8696
Eastell	+	–	+	+	+	+	+	–	+	–	–	+	+	–	+	–	–	–	+	+	+	+	–	x	60.8696
Cacoub	–	+	+	+	+	+	x	x	x	+	+	+	+	–	+	+	+	+	+	+	+	–	–	x	56.5217
Dolan	–	+	+	+	+	+	x	x	x	+	+	+	+	–	+	+	+	+	+	+	+	–	–	x	56.5217
Loddenkemper	+	–	+	+	+	–	+	+	+	–	–	+	+	–	+	+	–	–	–	–	+	–	–	x	52.1739
Healey	–	–	+	+	+	+	x	x	x	+	+	–	+	–	+	+	+	–	+	+	+	+	–	x	47.8261
Messina	–	–	+	+	+	–	–	–	–	–	–	+	+	+	+	+	x	+	+	+	+	–	–	x	47.8261
Miyamoto	+	–	+	+	+	+	–	–	–	–	–	+	+	+	+	+	x	–	–	+	+	–	–	x	47.8261
Skingle	–	–	+	+	+	+	–	–	–	–	–	+	+	–	+	–	+	+	+	–	+	–	–	x	47.8261
Boutsen	–	+	+	+	+	+	x	x	x	–	+	+	+	–	+	–	x	+	+	+	+	+	–	x	43.4783
Van Offel	–	–	+	+	+	+	x	x	x	–	–	–	+	+	+	+	+	–	+	+	+	+	–	x	43.4783
Adachi 94	+	–	+	+	+	–	+	+	+	–	–	–	+	–	+	+	+	x	x	x	+	+	–	x	43.4783
Lakatos	–	–	+	–	–	+	+	+	–	–	–	+	+	–	+	–	–	–	+	+	+	–	–	x	43.4783
Von Tirpitz	–	–	+	+	–	–	–	+	–	+	+	–	+	+	+	–	–	–	+	–	+	–	–	x	43.4783
Adachi 97	–	–	+	–	–	+	x	x	x	+	+	+	+	–	+	–	+	+	+	–	+	+	–	x	39.1304
Jenkins	–	–	+	–	–	–	x	x	x	–	–	–	+	–	+	+	+	+	+	+	+	+	–	x	30.4348
% Yes*	52.381	54.7619	100	90.4762	88.0952	71.4286	66.6667	63.3333	46.6667	52.381	57.1429	73.8095	100	45.2381	97.619	73.8095	76.1905	78.5714	71.4286	78.5714	100	69.0476	23.8095		64.2857
Transplantation
Wissing	+	–	+	+	+	–	+	+	+	+	+	–	+	–	+	+	+	+	+	+	+	+	+	+	79.1667
Crawford	+	+	+	+	+	+	x	x	x	+	+	–	+	–	+	+	+	+	+	+	+	+	+	+	62.5
Berguer	+	+	+	+	+	+	x	x	x	–	–	–	+	+	+	+	+	+	+	+	+	+	+	–	58.3333
Yun	+	+	+	+	–	–	–	–	–	–	–	–	+	–	+	+	–	+	+	+	+	+	+	+	54.1667
Shane	–	+	+	+	+	+	x	x	x	+	+	+	+	x	+	+	+	+	–	–	+	+	+	–	50
Fan	+	+	+	+	+	–	x	x	x	–	–	–	+	+	+	+	–	+	+	+	+	+	+	+	50
Termeulen	+	–	+	+	+	–	x	x	x	+	–	+	+	+	+	+	–	–	+	–	+	+	+	+	45.8333
Torres	+	–	+	+	+	+	x	x	x	–	–	+	+	+	+	+	–	–	+	–	+	+	+	+	45.8333
Aris	+	–	+	+	+	–	x	x	x	–	–	–	+	–	+	+	+	+	+	+	+	+	+	–	45.8333
Casez	–	–	+	+	+	+	x	x	x	–	–	+	+	x	+	+	+	+	+	–	+	+	+	–	41.6667
DeSevaux	–	–	+	+	+	+	x	x	x	+	+	+	+	x	+	+	+	–	+	–	+	–	+	–	41.6667
Nowacka-Cieciura	+	–	+	+	–	–	x	x	x	–	–	+	+	+	+	+	–	–	+	–	+	+	+	–	37.5
Josephson	+	+	+	+	+	+	x	x	x	–	–	–	–	–	–	+	–	–	+	+	+	+	+	–	37.5
Krieg	+	+	+	+	+	+	x	x	x	–	–	–	–	–	+	+	–	–	+	–	+	+	+	–	37.5
Masse	–	–	+	+	–	–	x	x	x	–	–	–	+	+	+	+	–	+	+	–	+	+	+	–	33.3333
Sambrook	+	+	+	+	–	–	x	x	x	–	–	–	+	–	+	+	–	–	+	–	+	+	+	–	33.3333
% Yes*	75	50	100	100	75	50	50	50	50	31	25	38	88	46	94	100	44	56	94	44	100	94	100	38	47.1354
* % Yes was calculated on the applicable studies resp. items
