# Supplementary material
Source: HighWire-hosted journal article supplement (https://rmdopen.bmj.com/content/2/2/e000313)

**Appendix 3.** Post-hoc analysis of publication year as predictive factor for bone loss, by disease group.

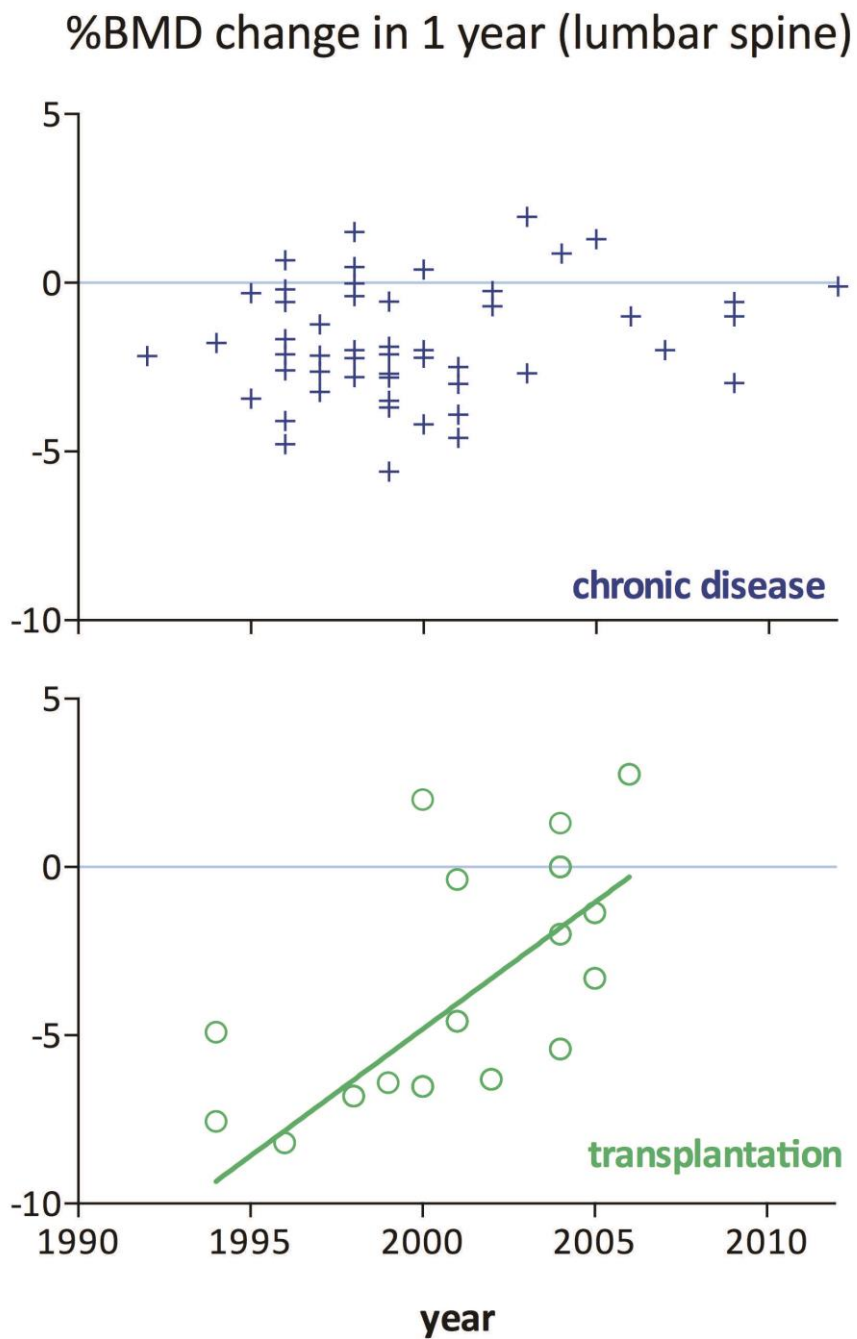

Supplement: inline-supplementary-material-3 [file inline-supplementary-material-3.pdf]
